# Supplementary material
Source: publisher figshare collection journal article supplement (https://acs.figshare.com/ndownloader/files/4603783)
Supplement: Supplementary file 1 [file 4603783]

## Supporting Information for

### Facile Synthesis of Fe-loaded Mesoporous Silica by a Combined Detemplation

#### -Incorporation Process through Fenton's Chemistry

Yong-Mei Liu, Jie Xu, Lin He, Yong Cao\*, He-Yong He, Dong-Yuan Zhao, Ji-Hua

Zhuang\* and Kang-Nian Fan

*Department of Chemistry & Shanghai Key Laboratory of Molecular Catalysis and Innovative Materials,*

*Fudan University, Shanghai 200433, P. R. China, E-mail: yongcao@fudan.edu.cn*

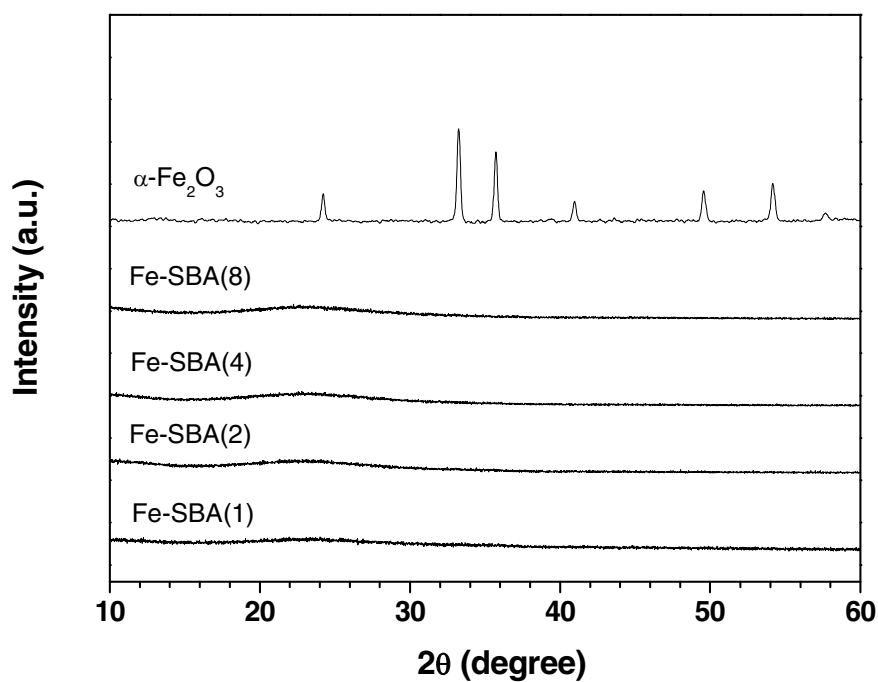

**Figure S1.** High angle X-ray diffraction patterns of various Fe-loaded SBA-15 materials.

For comparison, the diffraction pattern of crystalline α-Fe<sub>2</sub>O<sub>3</sub> is also included.

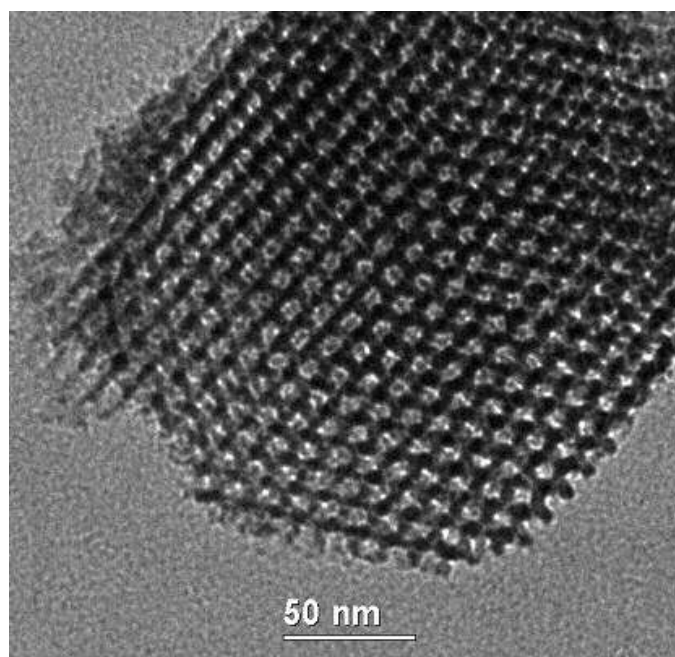

**Figure S2.** TEM image of sample Fe-SBA(4) after four times of recycling tests.
